# Supplementary material for: Identification of Genes Associated with Liver Metastasis in Pancreatic Cancer Reveals PCSK6 as a Crucial Mediator
Source: MDPI journal article supplement (doi:10.3390/cancers15010241), 2022-12-30
Supplement: s1 [file s1]

Supplemented Table S1 Oligos for sgRNAs, PCR and DNA sequencing

| Names             | Sequence (5'->3')         |
|-------------------|---------------------------|
| Hu_PCSK6_sgRNA1_f | CACCGCTGTACCGATGGCCACACT  |
| Hu_PCSK6_sgRNA1_r | AAACAGTGTGGCCATCGGTACAGC  |
| Hu_PCSK6_sgRNA2_f | CACCGCAGGTGCTGGACGTCCCTCC |
| Hu_PCSK6_sgRNA2_r | AAACGGAGGGACGTCCAGCACCTGC |
| Hu_NC_sgRNA_f     | CACCGCGGGACGTCGCGAAAATGTA |
| Hu_NC_sgRNA_r     | AAACTACATTTTCGCGACGTCCCGC |
| Hu_PCSK6_f        | GAGCGAAAAATCGTCACCAC      |
| Hu_PCSK6_r        | TCCAGTCGCTCGCTTTCAG       |
| Hu_beta_actin_f   | CACCATTGGCAATGAGCGGTTC    |
| Hu_beta_actin_r   | AGGTCTTTGCGGATGTCCACGT    |
| Hu_DNA-sgRNA1_f   | GCCTAACACCTTATTTGTTCCCGAG |
| Hu_DNA-sgRNA1_r   | GGTGCACGACTCACTGAATGTGCTT |
| Hu_DNA-sgRNA2_f   | CAAGGAATGCAGTCCTTAGCCTGAG |
| Hu_DNA-sgRNA2_r   | TGCGTTTTAAATTCTTGTGACACAC |
