# Supplementary material for: Identification of Genes Associated with Liver Metastasis in Pancreatic Cancer Reveals PCSK6 as a Crucial Mediator
Source: MDPI journal article supplement (doi:10.3390/cancers15010241), 2022-12-30
Supplement: s1 [file s1]

Supplemented Table S4. Prognostic genes obtained by Lasso Cox regression

| Genes   | Coefficient of Lasso |
|---------|----------------------|
| AGMAT   | 0.071011             |
| ALDH4A1 | -0.11302             |
| C2      | 0.162108             |
| CFP     | -0.32808             |
| CP      | 0.034735             |
| F12     | -0.06273             |
| GOT1    | -0.00017             |
| PCSK6   | 0.481866             |
| RBP5    | -0.03173             |
| TM4SF5  | -0.06306             |
