# Supplementary material for: Identification of Genes Associated with Liver Metastasis in Pancreatic Cancer Reveals PCSK6 as a Crucial Mediator
Source: MDPI journal article supplement (doi:10.3390/cancers15010241), 2022-12-30
Supplement: s1 [file s1]

Supplemented Table S3 Expressing profiles of 51 L-DEGs in cell lines of pancreatic cancer

| Gene    | Cell line  |            |            |            |            |          |            |
|---------|------------|------------|------------|------------|------------|----------|------------|
|         | ASPC1      | BXPC3      | CAPAN1     | CAPAN2     | CFPAC1     | HPAC     | HPAFII     |
|         | ACH-000222 | ACH-000535 | ACH-000354 | ACH-000107 | ACH-000138 | ACH-270  | ACH-000094 |
| ABCB4   | 0.111031   | 0.042644   | 0.189034   | 0.028569   | 0.584963   | 0.056584 | 0.163499   |
| DPEP1   | 2.914565   | 0.464668   | 0.097611   | 0.367371   | 0.545968   | 0.014355 | 1.570463   |
| MARCO   | 0.028569   | 2.31034    | 0.163499   | 0.070389   | 0.084064   | 0.111031 | 0.137504   |
| HSD17B6 | 0.298658   | 0.62293    | 1.464668   | 0.31034    | 0.565597   | 0.389567 | 0.189034   |
| CP      | 0.516015   | 1.31034    | 2.498251   | 0.400538   | 4.911212   | 4.120186 | 0.250962   |
| LMO3    | 0.695994   | 0.250962   | 0.887525   | 0.722466   | 0.15056    | 1.405992 | 0.201634   |
| ST6GAL1 | 0.124328   | 1.618239   | 3.343408   | 1.298658   | 1.799087   | 0.632268 | 0.176323   |
| AQP9    | 0          | 0          | 0.014355   | 0.014355   | 0          | 0.028569 | 0          |
| REG1A   | 0          | 0          | 0.238787   | 0.238787   | 0          | 0        | 0.056584   |
| PROC    | 5.450222   | 1.411426   | 2.173127   | 2.488001   | 2.709291   | 1.641546 | 2.370164   |
| AGMAT   | 3.664483   | 2.89724    | 2.568032   | 1.726831   | 0.704872   | 1.250962 | 3.163499   |
| GOT1    | 4.965323   | 5.888743   | 4.877253   | 5.454834   | 5.138323   | 4.767655 | 4.864434   |
| F10     | 0.286881   | 0.042644   | 0.782409   | 0.111031   | 0.189034   | 0.214125 | 0.263034   |
| CFP     | 0.495695   | 0.356144   | 0.632268   | 0.604071   | 1.367371   | 0.367371 | 1.056584   |
| APOE    | 0.475085   | 0.895303   | 2.987321   | 1.739848   | 3.304511   | 2.114367 | 0.669027   |
| APOC1   | 3.301588   | 3.295723   | 4.245648   | 4.929791   | 3.534809   | 3.861955 | 1.035624   |
| F12     | 4.832384   | 4.001802   | 4.67638    | 3.381283   | 3.889474   | 1.599318 | 4.999549   |
| CRP     | 0          | 0          | 0.028569   | 0          | 0          | 0.014355 | 0          |
| HMGCS2  | 0          | 0.042644   | 2.729009   | 0.084064   | 0.084064   | 0.137504 | 0.15056    |
| CYP2J2  | 0.137504   | 2.456806   | 2.017922   | 1.275007   | 2.62527    | 1.70044  | 2.82985    |
| GCHFR   | 6.708877   | 5.182692   | 3.104337   | 5.086614   | 6.197315   | 3.58376  | 4.475733   |
| CYP2C9  | 0.056584   | 0.15056    | 0.485427   | 0.028569   | 0.411426   | 0.014355 | 0.056584   |
| RBP4    | 4.056584   | 0.163499   | 1.599318   | 0.31034    | 2.367371   | 1.560715 | 4.849999   |
| RBP5    | 1.996389   | 1.15056    | 1.726831   | 1.952334   | 1.104337   | 2.07382  | 2.140779   |
| SORD    | 4.368768   | 6.474274   | 6.386294   | 4.392317   | 4.295723   | 4.339137 | 4.892391   |

Supplemented Table S3 continued

| Gene     | ASPC1<br>ACH-000222 | BXPC3<br>ACH-000535 | CAPAN1<br>ACH-000354 | CAPAN2<br>ACH-000107 | CFPAC1<br>ACH-000138 | HPAC<br>ACH-270 | HPAFII<br>ACH-000094 |
|----------|---------------------|---------------------|----------------------|----------------------|----------------------|-----------------|----------------------|
| PCSK6    | 5.010332            | 4.926948            | 4.716442             | 3.791814             | 1.847997             | 3.731183        | 3.596935             |
| SLC13A5  | 0                   | 0.056584            | 0.201634             | 1.063503             | 2.518535             | 0.028569        | 1.941106             |
| ASGR1    | 0.31034             | 0.594549            | 0.948601             | 0.070389             | 0.695994             | 1.035624        | 0.678072             |
| TM4SF5   | 5.244507            | 0.097611            | 2.641546             | 2.361768             | 1.495695             | 0.056584        | 5.484783             |
| ITIH2    | 0                   | 0                   | 0.014355             | 0                    | 0.176323             | 0               | 0.042644             |
| TDO2     | 0.042644            | 0.070389            | 0.070389             | 0.056584             | 0.782409             | 0.014355        | 0.014355             |
| CPB1     | 0                   | 0                   | 0                    | 0                    | 0.070389             | 0               | 0.014355             |
| ALDH4A1  | 1.510962            | 4.82171             | 3.139142             | 2.641546             | 2.613532             | 2.693766        | 2.757023             |
| ITIH3    | 0                   | 0.084064            | 0                    | 0.084064             | 0.028569             | 0               | 0                    |
| C2       | 0.422233            | 1.584963            | 1.207893             | 0.263034             | 0.918386             | 0.097611        | 0.575312             |
| CTRB2    | 0.097611            | 0.042644            | 0.333424             | 0.31034              | 0.485427             | 0.111031        | 0.176323             |
| ATF5     | 4.412782            | 6.171927            | 4.395063             | 4.8166               | 4.014355             | 4.127633        | 5.013016             |
| GP2      | 0                   | 0                   | 0.014355             | 0                    | 0                    | 0               | 0.014355             |
| CEL      | 0.400538            | 2.443607            | 0.831877             | 0.613532             | 0.400538             | 1.056584        | 0.298658             |
| FGG      | 0.014355            | 0.137504            | 0.137504             | 0                    | 1.124328             | 0               | 0.137504             |
| FGA      | 0                   | 0.014355            | 0.028569             | 0.028569             | 1.189034             | 0               | 0                    |
| FGB      | 0                   | 0.084064            | 0.111031             | 0.070389             | 3.132577             | 0.124328        | 0.189034             |
| REG3A    | 0                   | 0                   | 0                    | 0                    | 0                    | 0               | 0                    |
| REG1B    | 0                   | 0                   | 0                    | 0                    | 0                    | 0               | 0                    |
| DHCR7    | 5.255501            | 6.54782             | 6.312701             | 8.147612             | 5.427271             | 5.372952        | 6.393348             |
| PC       | 3.237258            | 4.334139            | 3.602884             | 3.454176             | 3.613532             | 2.650765        | 3.933573             |
| PNLIP    | 0                   | 0                   | 0                    | 0                    | 0.014355             | 0               | 0                    |
| SERPINA1 | 0.815575            | 0.584963            | 4.390943             | 8.436212             | 7.755021             | 2.298658        | 6.59902              |
| ANG      | 3.57289             | 1.049631            | 3.596935             | 2.223423             | 2.565597             | 1.589764        | 4.039138             |
| APOC2    | 0.250962            | 0.163499            | 0                    | 0.084064             | 0                    | 0.344829        | 0.176323             |

Supplemented Table S3 continued

| Gene    | HS766T<br>ACH-000178 | MIAPACA2<br>ACH-000601 | PANC1<br>ACH-000164 | SU8686<br>ACH-000114 | SUIT2<br>ACH-000652 | SW1990<br>ACH-000155 |
|---------|----------------------|------------------------|---------------------|----------------------|---------------------|----------------------|
| ABCB4   | 0.028569             | 0                      | 0                   | 1.521051             | 0.15056             | 0                    |
| DPEP1   | 0                    | 0.084064               | 0.238787            | 0.137504             | 5.014802            | 0.15056              |
| MARCO   | 0                    | 0                      | 0                   | 0.389567             | 0                   | 0.014355             |
| HSD17B6 | 0.226509             | 0.799087               | 0.970854            | 1.090853             | 0.555816            | 0.238787             |
| CP      | 0.565597             | 0.298658               | 0.773996            | 3.030336             | 1.41684             | 0.238787             |
| LMO3    | 0.028569             | 0.056584               | 0.201634            | 0.83996              | 1.803227            | 0.111031             |
| ST6GAL1 | 2.235727             | 1.819668               | 0.831877            | 4.331992             | 1.144046            | 0.137504             |
| AQP9    | 0                    | 0                      | 0                   | 0.042644             | 0                   | 0                    |
| REG1A   | 0                    | 0                      | 0                   | 0                    | 0                   | 0                    |
| PROC    | 0.613532             | 0.042644               | 2.107688            | 2.523562             | 1.594549            | 0.505891             |
| AGMAT   | 2.275007             | 0.070389               | 2.01078             | 0.895303             | 4.074677            | 1.02148              |
| GOT1    | 5.286142             | 5.20085                | 5.950702            | 5.910972             | 5.114367            | 4.924575             |
| F10     | 0.028569             | 0.163499               | 0.275007            | 1.678072             | 1.895303            | 0.411426             |
| CFP     | 0.321928             | 0.863939               | 0.298658            | 2.07382              | 0.097611            | 2.568032             |
| APOE    | 0.933573             | 1.280956               | 7.907792            | 5.540399             | 0.910733            | 0.978196             |
| APOC1   | 2.435629             | 5.470537               | 5.14037             | 3.145677             | 3.472488            | 1.632268             |
| F12     | 1.682573             | 3.347666               | 3.782409            | 3.094236             | 2.253989            | 3.721373             |
| CRP     | 0.250962             | 0                      | 0                   | 0                    | 0                   | 0                    |
| HMGCS2  | 0.111031             | 0.042644               | 0.097611            | 0.042644             | 7.170326            | 0.084064             |
| CYP2J2  | 0.028569             | 0.042644               | 0.056584            | 2.698218             | 0.163499            | 0.097611             |
| GCHFR   | 4.354029             | 0.847997               | 4.039138            | 4.78398              | 7.192885            | 4.575312             |
| CYP2C9  | 0.042644             | 0                      | 0.014355            | 0.042644             | 0.400538            | 0                    |
| RBP4    | 2.807355             | 0.464668               | 1.176323            | 0.669027             | 2.819668            | 0.887525             |
| RBP5    | 1.169925             | 1.641546               | 0.389567            | 3.032101             | 1.565597            | 1.035624             |
| SORD    | 4.679199             | 5.434962               | 4.909293            | 4.231893             | 6.740253            | 4.252476             |

Supplemented Table S3 continued

| Gene     | HS766T<br>ACH-000178 | MIAPACA2<br>ACH-000601 | PANC1<br>ACH-000164 | SU8686<br>ACH-000114 | SUIT2<br>ACH-000652 | SW1990<br>ACH-000155 |
|----------|----------------------|------------------------|---------------------|----------------------|---------------------|----------------------|
| PCSK6    | 1.790772             | 2.392317               | 2.032101            | 5.402927             | 6.117072            | 1.232661             |
| SLC13A5  | 0.31034              | 0                      | 0                   | 2.077243             | 0                   | 0.014355             |
| ASGR1    | 0.704872             | 1.773996               | 0.584963            | 1.495695             | 0.871844            | 0.31034              |
| TM4SF5   | 0.214125             | 0                      | 0.124328            | 0.632268             | 3.134221            | 0                    |
| ITIH2    | 0                    | 0.014355               | 0.014355            | 0                    | 0                   | 0.014355             |
| TDO2     | 0                    | 0.432959               | 0.641546            | 1.500802             | 0.650765            | 0.014355             |
| CPB1     | 0                    | 0                      | 0                   | 0.432959             | 0                   | 0                    |
| ALDH4A1  | 4.078097             | 4.806324               | 3.563158            | 2.788686             | 2.655352            | 3.181103             |
| ITIH3    | 0                    | 0.056584               | 0.028569            | 0.111031             | 0                   | 0.201634             |
| C2       | 0.815575             | 0.575312               | 0.575312            | 2.462052             | 0.201634            | 0.863939             |
| CTRB2    | 0.333424             | 0.084064               | 0.070389            | 0.201634             | 0                   | 0                    |
| ATF5     | 4.361066             | 6.84712                | 7.145066            | 4.635174             | 4.393691            | 5.269033             |
| GP2      | 0                    | 0                      | 0                   | 0.028569             | 0.163499            | 0                    |
| CEL      | 3.119356             | 1.608809               | 0.321928            | 0.903038             | 0.214125            | 0.722466             |
| FGG      | 0                    | 0.056584               | 0.275007            | 0.31034              | 0.042644            | 0.124328             |
| FGA      | 0.014355             | 0                      | 0.137504            | 0.124328             | 0                   | 0.137504             |
| FGB      | 0.042644             | 0.070389               | 0.214125            | 0.176323             | 0.137504            | 0.028569             |
| REG3A    | 0                    | 0                      | 0                   | 0                    | 0                   | 0                    |
| REG1B    | 0                    | 0                      | 0                   | 0                    | 0                   | 0                    |
| DHCR7    | 4.502712             | 4.917432               | 7.10842             | 6.758889             | 5.830864            | 2.790772             |
| PC       | 3.927896             | 4.164304               | 3.165108            | 3.865919             | 4.216455            | 2.746313             |
| PNLIP    | 0                    | 0                      | 0                   | 0                    | 0                   | 0                    |
| SERPINA1 | 2.353323             | 0.584963               | 0.400538            | 5.999549             | 1.49057             | 2.513491             |
| ANG      | 0.948601             | 1.014355               | 1.350497            | 2.827819             | 2.087463            | 1.443607             |
| APOC2    | 0                    | 0                      | 0                   | 0                    | 0                   | 0.056584             |
