# Supplementary material for: Identification of Genes Associated with Liver Metastasis in Pancreatic Cancer Reveals PCSK6 as a Crucial Mediator
Source: MDPI journal article supplement (doi:10.3390/cancers15010241), 2022-12-30
Supplement: s1 [file s1]

A

SUIT-WT or NC

5'-GCTGTACCGATGGCCACACTGGG-3'

|||||

3'-CGACATGGCTACCGGTGTGACCC-5'

NC\_000015.10 100166-100188bp

SUIT-SC1

Mutation 1: Deletion of 2 bps

5'-GCTGTACCGATGGCCACTGGG-3'

|||||

3'-CGACATGGCTACCGGTGACCC-5'

SUIT-SC1

Mutation 2: Insertion of 618 bps

5'-GCTGTACCGATGGCCAC-ACTGGG-3'

|||||

3'-CGACATGGCTACCGGTG-TGACCC-5'

C

MIA-WT or NC

5'-GCTGTACCGATGGCCACACTGGG-3'

|||||

3'-CGACATGGCTACCGGTGTGACCC-5'

NC\_000015.10 100166-100188bp

MIA-SC1

Mutation 1: Insertion of 108 bps

5'-GCTGTACCGATGGCCAC-ACTGGG-3'

|||||

3'-CGACATGGCTACCGGTG-TGACCC-5'

MIA-SC1

Mutation 2: Insertion of 2 bps

5'-GCTGTACCGATGGCCAC-ACTGGG-3'

|||||

3'-CGACATGGCTACCGGTG-TGACCC-5'

B

SUIT-WT or NC

5'-CCTGGAGGGACGTCCAGCACCTG-3'

|||||

3'-GGA<sup>+</sup>CCTCCCTGCAGGTCGTGGAC-5'

NC\_000015.10 105294-105316bp

SUIT-SC2

Mutation 1: Deletion of 1 bp

5'-CCTGGAGGACGTCCAGCACCTG-3'

|||||

3'-GGA<sup>+</sup>CCTCCTGCAGGTCGTGGAC-5'

SUIT-SC2

Mutation 2: Deletion of 5 bps

5'-CCTGGAGTCCAGCACCTG-3'

|||||

3'-GGA<sup>+</sup>CCTCAGGTCGTGGAC-5'

SUIT-SC2

Mutation 3: Insertion of 1 bp

5'-CCTGGA-GGGACGTCCAGCACCTG-3'

|||||

3'-GGA<sup>+</sup>CCT-CCCTGCAGGTCGTGGAC-5'

D

MIA-WT or NC

5'-CCTGGAGGGACGTCCAGCACCTG-3'

|||||

3'-GGA<sup>+</sup>CCTCCCTGCAGGTCGTGGAC-5'

NC\_000015.10 105294-105316bp

MIA -SC2

Mutation: Insertion of 1 bp

5'-CCTGGA-GGGACGTCCAGCACCTG-3'

|||||

3'-GGA<sup>+</sup>CCT-CCCTGCAGGTCGTGGAC-5'
