# Supplementary material for: Identification of Genes Associated with Liver Metastasis in Pancreatic Cancer Reveals PCSK6 as a Crucial Mediator
Source: MDPI journal article supplement (doi:10.3390/cancers15010241), 2022-12-30
Supplement: s1 [file s1]

Supplemented Table S7. The intensity ratios of the bands in Western blot

| <b>Repeat 1 of p-ERK in MIA PaCa-2</b> |             |             |             |             |
|----------------------------------------|-------------|-------------|-------------|-------------|
|                                        | WT          | NC          | SC1         | SC2         |
| p-ERK                                  | 36164.30866 | 36735.28784 | 16889.12489 | 3792.334524 |
| GAPDH                                  | 33709.70206 | 33192.95332 | 30692.85281 | 39445.68124 |
| ratio                                  | 1.072816028 | 1.106719474 | 0.550262466 | 0.096140678 |
| <b>Repeat 2 of p-ERK in MIA PaCa-2</b> |             |             |             |             |
|                                        | WT          | NC          | SC1         | SC2         |
| p-ERK                                  | 33029.60155 | 35008.80256 | 14447.92388 | 3771.041631 |
| GAPDH                                  | 40839.48023 | 37054.70206 | 27170.73149 | 34284.5513  |
| ratio                                  | 0.808766453 | 0.944787048 | 0.531745856 | 0.109992445 |
| <b>Repeat 3 of p-ERK in MIA PaCa-2</b> |             |             |             |             |
|                                        | WT          | NC          | SC1         | SC2         |
| p-ERK                                  | 33927.48023 | 37088.40916 | 11582.78175 | 3664.727922 |
| GAPDH                                  | 32700.35891 | 37277.75231 | 32273.66043 | 29106.3381  |
| ratio                                  | 1.037526234 | 0.994920747 | 0.358892719 | 0.125908244 |
| <b>Repeat 1 of ERK in MIA PaCa-2</b>   |             |             |             |             |
|                                        | WT          | NC          | SC1         | SC2         |
| p-ERK                                  | 40187.23759 | 38935.31728 | 32234.85281 | 36169.23759 |
| GAPDH                                  | 42077.87363 | 39212.4386  | 34808.19596 | 33389.63099 |
| ratio                                  | 0.955068166 | 0.992932821 | 0.926070769 | 1.083247599 |
| <b>Repeat 2 of ERK in MIA PaCa-2</b>   |             |             |             |             |
|                                        | WT          | NC          | SC1         | SC2         |
| p-ERK                                  | 38329.01576 | 41938.02439 | 31499.66043 | 31960.75231 |
| GAPDH                                  | 43149.53048 | 43351.3381  | 34188.07464 | 29683.21677 |
| ratio                                  | 0.888283495 | 0.967398614 | 0.921363977 | 1.076728057 |
| <b>Repeat 3 of ERK in MIA PaCa-2</b>   |             |             |             |             |
|                                        | WT          | NC          | SC1         | SC2         |
| p-ERK                                  | 37529.06602 | 37455.66043 | 28145.48885 | 27702.53048 |
| GAPDH                                  | 39829.77312 | 39339.75231 | 31150.4386  | 31326.6518  |
| ratio                                  | 0.9422365   | 0.952107175 | 0.903534272 | 0.884311884 |
