# Supplementary material for: Identification of Genes Associated with Liver Metastasis in Pancreatic Cancer Reveals PCSK6 as a Crucial Mediator
Source: MDPI journal article supplement (doi:10.3390/cancers15010241), 2022-12-30
Supplement: s1 [file s1]

Supplemented Table S2 Characteristics of data serials

| GSE accession | Platform | Primary tumor | Adjacent normal tissue | Liver metastasis | Author and year          | Region          |
|---------------|----------|---------------|------------------------|------------------|--------------------------|-----------------|
| GSE62452      | GPL6244  | 69            | 61                     |                  | Yang et al. 2016         | USA and Germany |
| GSE15471      | GPL570   | 39            | 39                     |                  | Badea et al. 2009        | Romania         |
| GSE62165      | GPL13667 | 118           | 13                     |                  | Janky et al, 2016        | Belgium         |
| GSE102238     | GPL19072 | 50            | 50                     |                  | Yang et al. 2017         | China           |
| GSE32688      | GPL570   | 25            | 7                      |                  | Donahue et al. 2011      | USA             |
| GSE43288      | GPL96    | 4             | 3                      |                  | Crnogorac et al. 2013    | UK              |
| GSE63111      | GPL5188  | 28            | 6                      |                  | Wang et al. 2017         | UK              |
| GSE23397      | GPL5188  | 15            | 6                      |                  | Gerhardinger et al. 2013 | Germany         |
| GSE42952      | GPL570   | 12            |                        | 7                | Van et al. 2013          | Belgium         |
| GSE71729      | GPL20769 | 145           |                        | 25               | Moffitt et al. 2015      | USA             |
