# Supplementary material for: Identification of Genes Associated with Liver Metastasis in Pancreatic Cancer Reveals PCSK6 as a Crucial Mediator
Source: MDPI journal article supplement (doi:10.3390/cancers15010241), 2022-12-30
Supplement: s1 [file s1]

Supplemented Table S6. The intensity ratios of the bands in Western blot

| <b>Repeat 1 of p-ERK in SUIT-2</b> |             |             |             |             |
|------------------------------------|-------------|-------------|-------------|-------------|
|                                    | WT          | NC          | SC1         | SC2         |
| p-ERK                              | 37498.63099 | 36623.02439 | 6200.133514 | 4443.748737 |
| GAPDH                              | 32987.63099 | 32679.73149 | 34010.73149 | 41744.03658 |
| ratio                              | 1.136748225 | 1.120664789 | 0.182299329 | 0.106452301 |
| <b>Repeat 2 of p-ERK in SUIT-2</b> |             |             |             |             |
|                                    | WT          | NC          | SC1         | SC2         |
| p-ERK                              | 28521.60155 | 35161.87363 | 7078.890873 | 4818.062446 |
| GAPDH                              | 20554.53048 | 23865.16652 | 26271.05382 | 34556.3381  |
| ratio                              | 1.38760657  | 1.47335547  | 0.269455916 | 0.139426302 |
| <b>Repeat 3 of p-ERK in SUIT-2</b> |             |             |             |             |
|                                    | WT          | NC          | SC1         | SC2         |
| p-ERK                              | 41441.72287 | 38504.28784 | 6209.669048 | 4730.819805 |
| GAPDH                              | 29754.20815 | 26502.26703 | 28568.92388 | 41472.08683 |
| ratio                              | 1.392802076 | 1.452867704 | 0.217357471 | 0.114072384 |
| <b>Repeat 1 of ERK in SUIT-2</b>   |             |             |             |             |
|                                    | WT          | NC          | SC1         | SC2         |
| p-ERK                              | 31399.75231 | 29046.31728 | 34695.24621 | 39438.26703 |
| GAPDH                              | 32160.45942 | 27073.70206 | 32909.45942 | 43737.99495 |
| ratio                              | 0.97634651  | 1.072860934 | 1.054263632 | 0.901693529 |
| <b>Repeat 2 of ERK in SUIT-2</b>   |             |             |             |             |
|                                    | WT          | NC          | SC1         | SC2         |
| p-ERK                              | 30827.53048 | 30797.16652 | 36906.21677 | 36382.40916 |
| GAPDH                              | 31307.3381  | 24510.09545 | 38663.73149 | 37402.5513  |
| ratio                              | 0.984674276 | 1.256509449 | 0.954543583 | 0.972725333 |
| <b>Repeat 3 of ERK in SUIT-2</b>   |             |             |             |             |
|                                    | WT          | NC          | SC1         | SC2         |
| p-ERK                              | 29904.13708 | 26927.75231 | 36356.31728 | 41095.16652 |
| GAPDH                              | 35719.48023 | 31661.70206 | 38976.80256 | 37087.90307 |
| ratio                              | 0.837194071 | 0.850483409 | 0.93276808  | 1.108047722 |
