# Supplementary material for: Identification of Genes Associated with Liver Metastasis in Pancreatic Cancer Reveals PCSK6 as a Crucial Mediator
Source: MDPI journal article supplement (doi:10.3390/cancers15010241), 2022-12-30
Supplement: s1 [file s1]

Table S5. Cleavage sites of proprotein convertases on target proteins from ELM database

| Protein    | NCBI Reference Sequence | Accession  | Cleavage sites                    |
|------------|-------------------------|------------|-----------------------------------|
| Kras       | NP_004976.2             | ELME000100 | (K-R- -X)                         |
|            |                         | ELME000146 | ([RK]-X-[hydrophobic]-[LTKF]- -X) |
|            |                         | ELME000103 | (R-X-X-X-[RK]-R- -X)              |
| Raf        | NP_001361187.1          | ELME000100 | (K-R- -X)                         |
|            |                         | ELME000146 | ([RK]-X-[hydrophobic]-[LTKF]- -X) |
| MEK1/2     | NP_002746.1/109587.1    | ELME000100 | (K-R- -X)                         |
|            |                         | ELME000146 | ([RK]-X-[hydrophobic]-[LTKF]- -X) |
| ERK1/2     | NP_002737.2/002736.3    | ELME000100 | (K-R- -X)                         |
|            |                         | ELME000146 | ([RK]-X-[hydrophobic]-[LTKF]- -X) |
| E-cadherin | NP_004351.1             | ELME000100 | (K-R- -X)                         |
|            |                         | ELME000146 | ([RK]-X-[hydrophobic]-[LTKF]- -X) |
|            |                         | ELME000101 | (R-X-[RK]-R- -X)                  |
