# Supplementary figures and images for: Identification of Genes Associated with Liver Metastasis in Pancreatic Cancer Reveals PCSK6 as a Crucial Mediator
Source: MDPI journal article supplement (doi:10.3390/cancers15010241), 2022-12-30

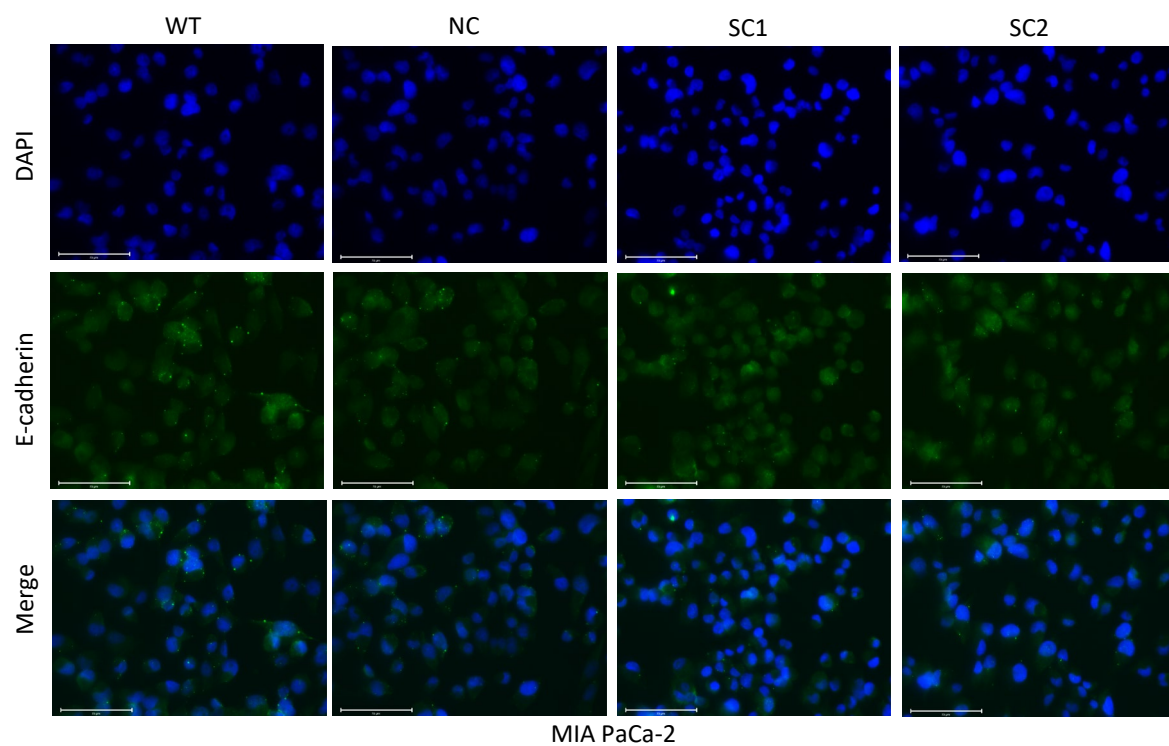

Supplement: s1 [file s1]

A

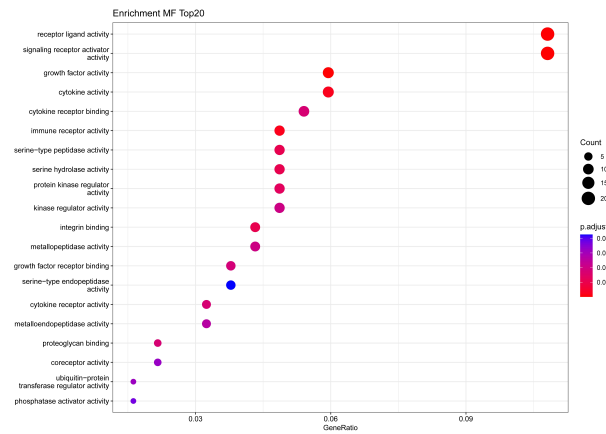

B

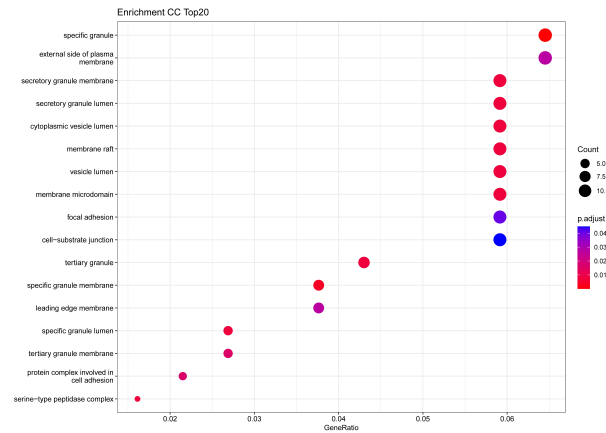

C

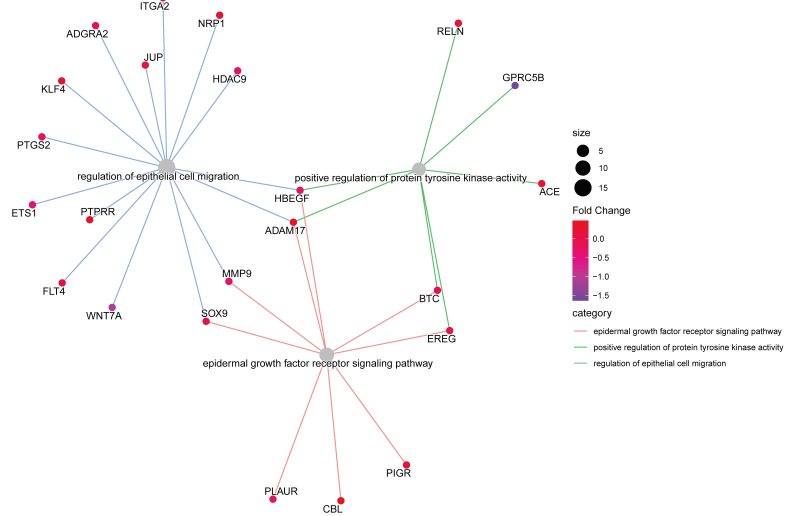

Supplement: s1 [file s1]
